# Supplementary material for: Transcriptional Blood Signatures Distinguish Pulmonary Tuberculosis, Pulmonary Sarcoidosis, Pneumonias and Lung Cancers
Source: PLoS One. 2013 Aug 5;8(8):e70630. doi: 10.1371/journal.pone.0070630 (PMC3734176; doi:10.1371/journal.pone.0070630)

Figure S3

Pulmonary Granulomatous Diseases

Controls

***Pulmonary  
Tuberculosis***

***Pulmonary  
Sarcoidosis***

***Healthy  
Controls***

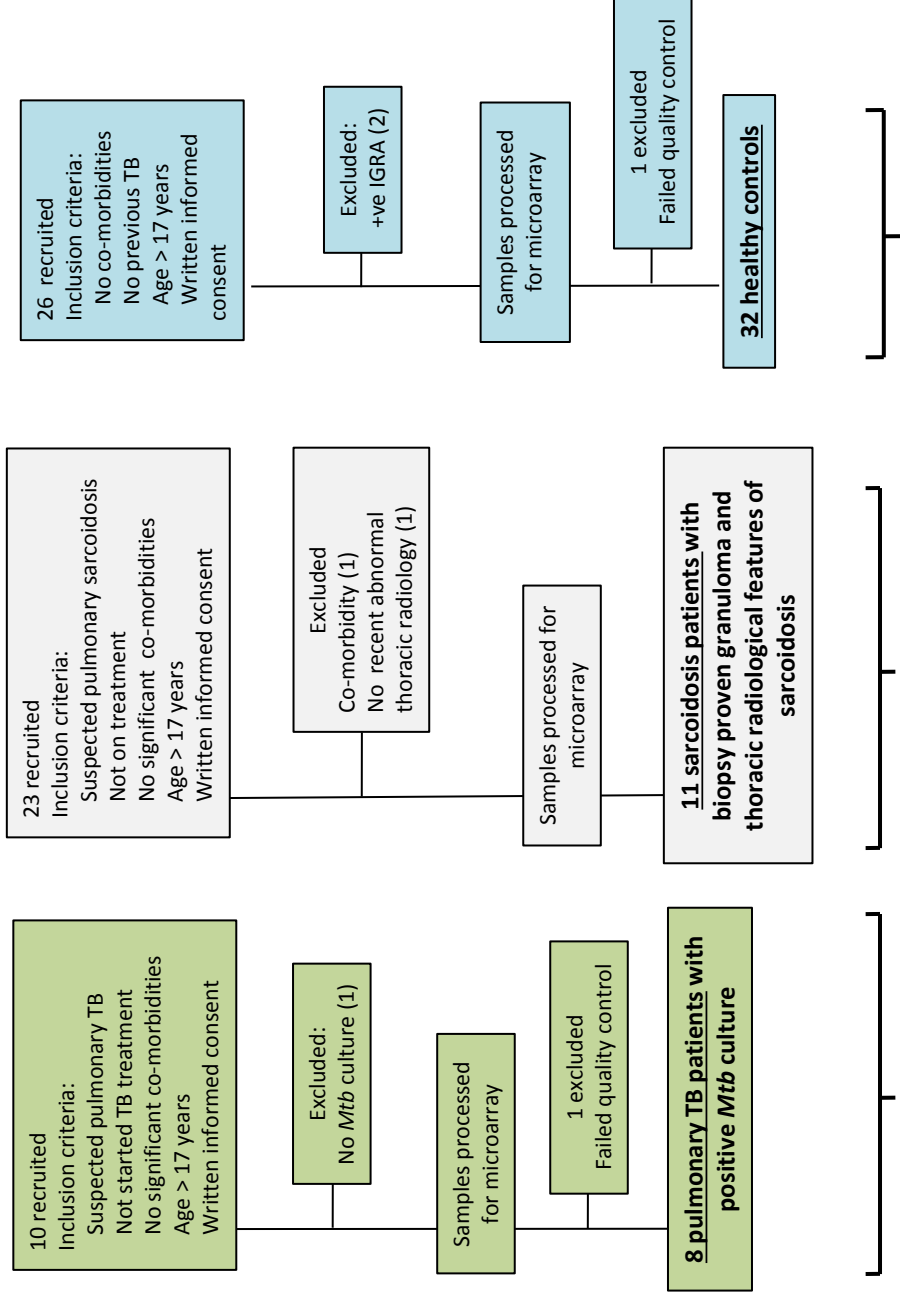

Supplement: Figure S3 — Recruitment flow diagrams for each disease group and healthy controls in the Validation Set. (PDF) [file pone.0070630.s003.pdf]
