# Supplementary material for: Transcriptional Blood Signatures Distinguish Pulmonary Tuberculosis, Pulmonary Sarcoidosis, Pneumonias and Lung Cancers
Source: PubMed Central journal article supplement (PMC3734176; doi:10.1371/journal.pone.0070630), 2013-08-05
Supplement: pone.0070630.s001.pdf [file pone.0070630.s001.pdf]

**Figure S1**

**Pulmonary Granulomatous Diseases**

**Pulmonary Tuberculosis**

23 recruited  
Inclusion criteria:  
Suspected pulmonary TB  
Not started TB treatment  
No significant co-morbidities  
Age > 17 years  
Written informed consent

Excluded:  
No *Mtb* culture (3)  
Co-morbidity (3)

Samples processed for microarray

1 excluded  
Failed quality control

**16 pulmonary TB patients with positive *Mtb* culture**

**Pulmonary Sarcoidosis**

41 recruited  
Inclusion criteria:  
Suspected pulmonary sarcoidosis  
Not on treatment  
No significant co-morbidities  
Age > 17 years  
Written informed consent

Excluded  
Co-morbidity (3)  
Negative/no biopsy (3)  
No recent abnormal thoracic radiology (7)

Samples processed for microarray

1 excluded  
Failed quality control

**25 sarcoidosis patients with biopsy proven granuloma and thoracic radiological features of sarcoidosis**

**Other Similar Respiratory Diseases**

**Community Acquired Pneumonia**

12 recruited  
Inclusion criteria:  
Suspected bacterial pneumonia  
No previous TB  
Age > 17 years  
Written informed consent

Excluded:  
Normal chest X-ray (2)  
Wrong diagnosis (1)  
Pneumonia resolved (1)

Samples processed for microarray

**8 community acquired pneumonia patients as per the BTS guidelines**

**Primary Lung Cancer**

8 recruited  
Inclusion criteria:  
Histological evidence  
Radiological evidence  
No previous TB  
Age > 17 years  
Written informed consent

Samples processed for microarray

**8 lung cancer patients with histological and radiological features of primary lung cancer**

**Controls**

**Healthy Controls**

45 recruited  
Inclusion criteria:  
No co-morbidities  
No previous TB  
Age > 17 years  
Written informed consent

Excluded:  
+ve IGRA (7)

Samples processed for microarray

**38 healthy controls**

**16 TB**

**25 Sarcoidosis**

**16 Other Respiratory**

**38 Controls**
