# Supplementary material for: Transcriptional Blood Signatures Distinguish Pulmonary Tuberculosis, Pulmonary Sarcoidosis, Pneumonias and Lung Cancers
Source: PubMed Central journal article supplement (PMC3734176; doi:10.1371/journal.pone.0070630), 2013-08-05

**Figure S4A**

*Training Set: 3422 transcripts*

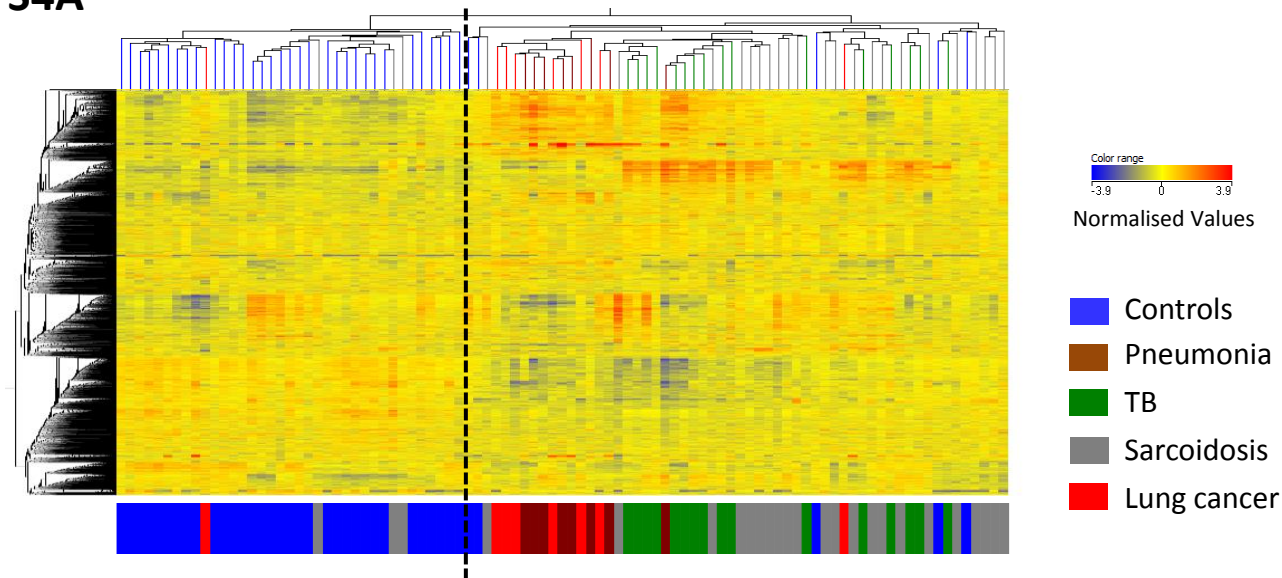

**Figure S4B**

*Training Set: 1446 transcripts*

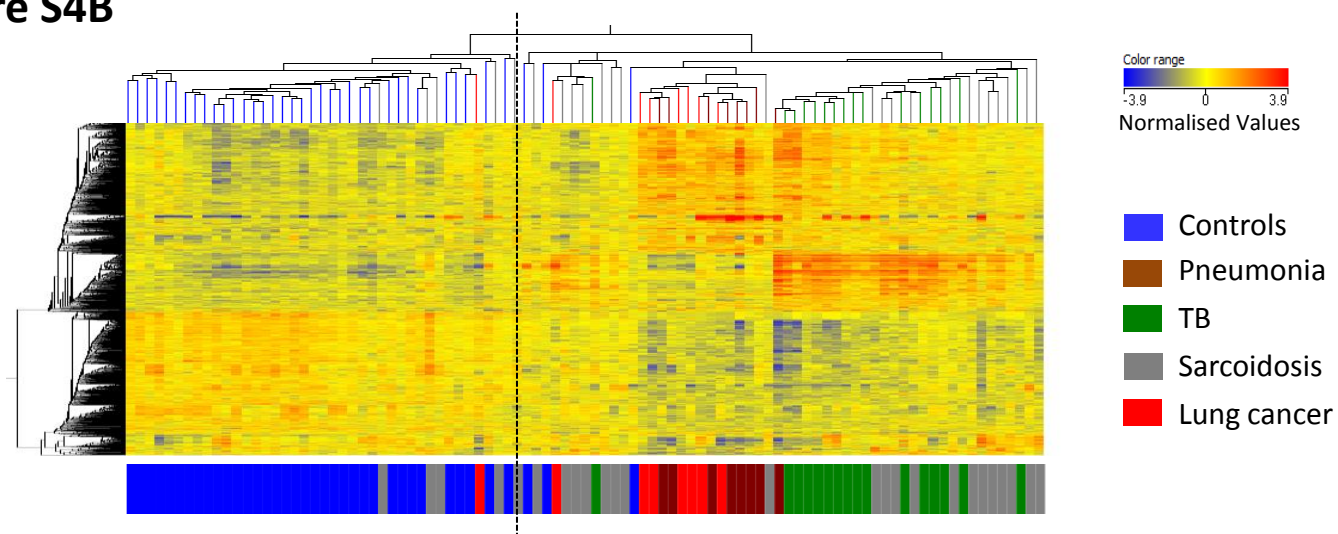

Supplement: pone.0070630.s004.pdf [file pone.0070630.s004.pdf]
