# Supplementary material for: Transcriptional Blood Signatures Distinguish Pulmonary Tuberculosis, Pulmonary Sarcoidosis, Pneumonias and Lung Cancers
Source: PubMed Central journal article supplement (PMC3734176; doi:10.1371/journal.pone.0070630), 2013-08-05

Figure S7

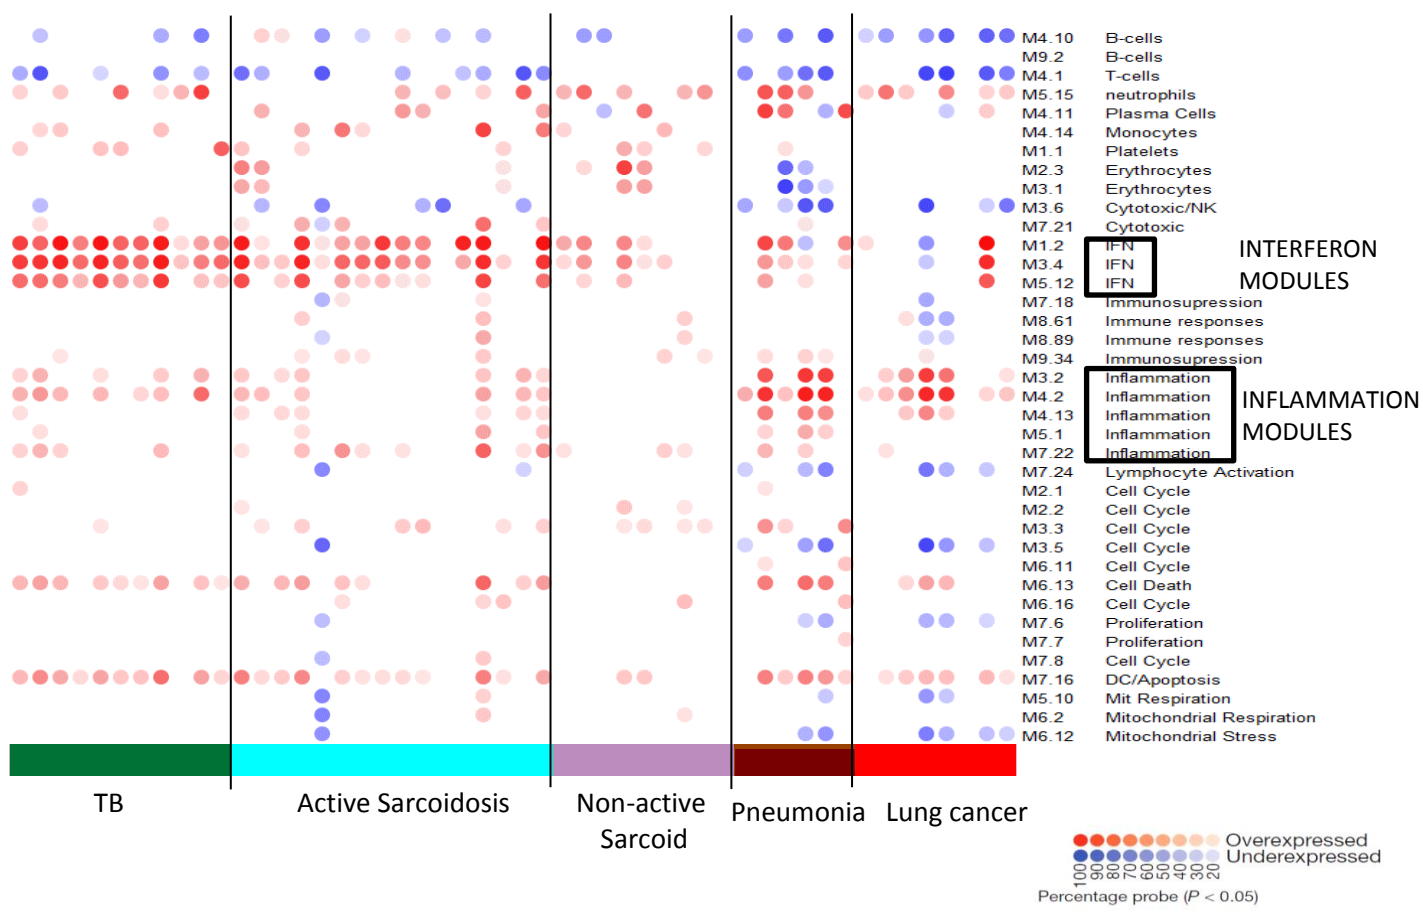

Supplement: pone.0070630.s007.pdf [file pone.0070630.s007.pdf]
