# Supplementary material for: Transcriptional Blood Signatures Distinguish Pulmonary Tuberculosis, Pulmonary Sarcoidosis, Pneumonias and Lung Cancers
Source: PubMed Central journal article supplement (PMC3734176; doi:10.1371/journal.pone.0070630), 2013-08-05
Supplement: pone.0070630.s011.pdf [file pone.0070630.s011.pdf]

**Figure S11**

**A**

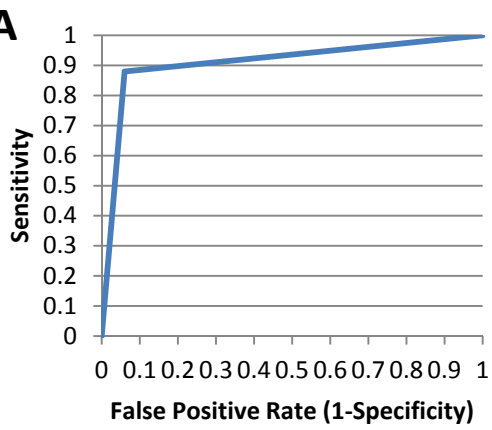

*Training Set, AUC = 0.91*

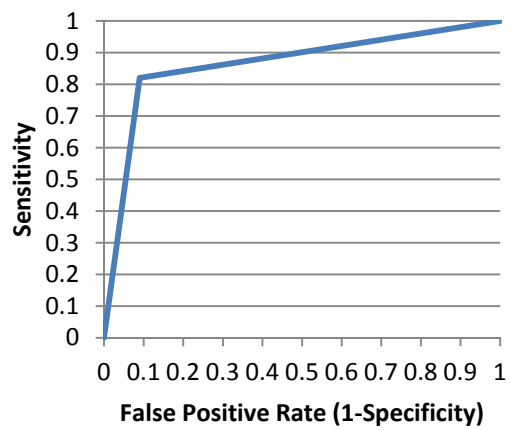

*Test Set, AUC = 0.87*

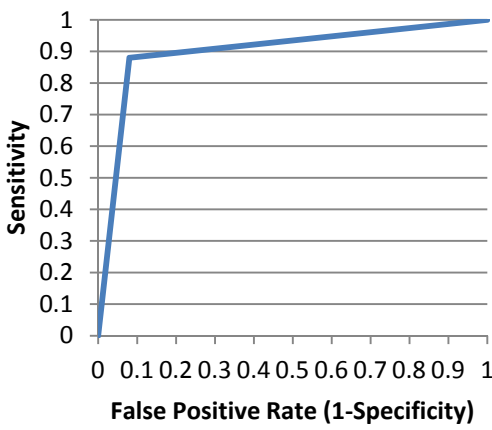

*Validation Set, AUC = 0.9*

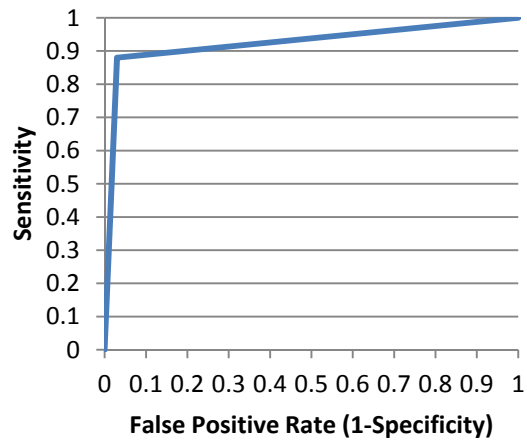

*Maertzdorf study, AUC = 0.93*

**B**

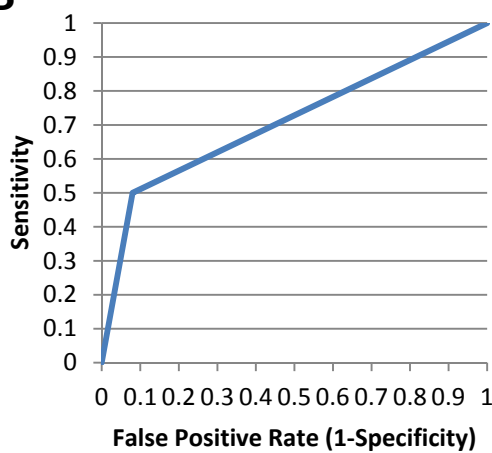

*Training Set, AUC = 0.76*

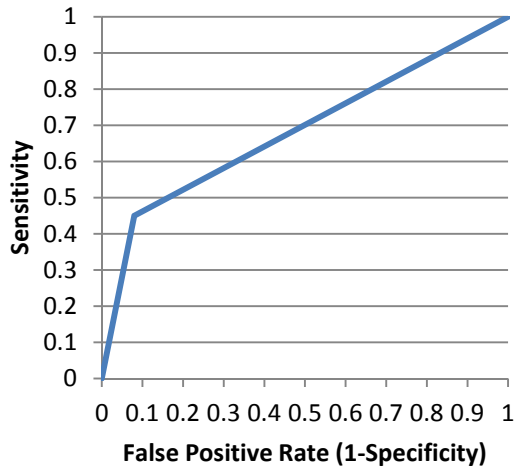

*Test Set, AUC = 0.69*

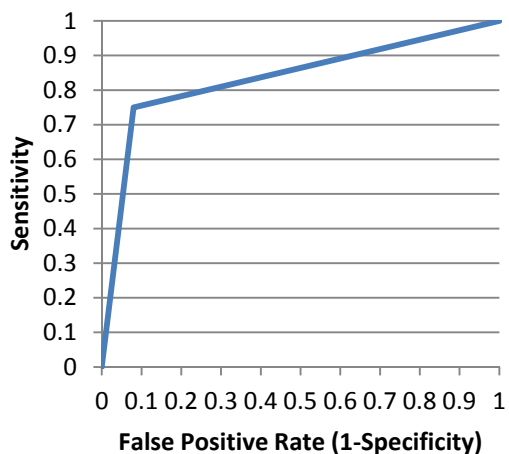

**Validation Set, AUC = 0.84**

**C**

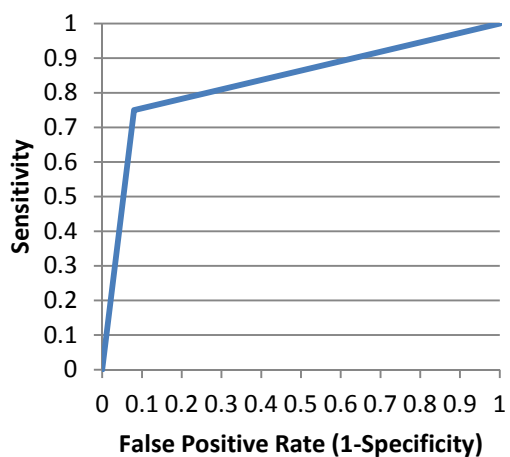

**Training Set, AUC = 0.84**

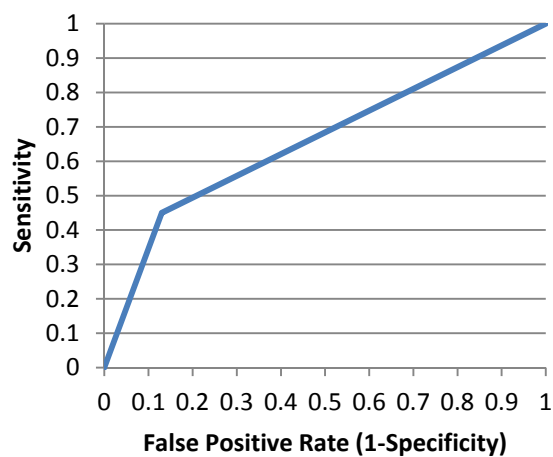

**Test Set, AUC = 0.66**

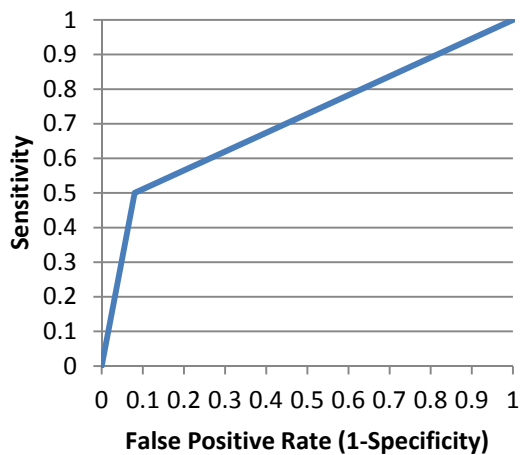

**Validation Set, AUC = 0.71**
