# Supplementary material for: Transcriptional Blood Signatures Distinguish Pulmonary Tuberculosis, Pulmonary Sarcoidosis, Pneumonias and Lung Cancers
Source: PLOS journal article supplement (doi:10.1371/journal.pone.0070630), 2013-08-05

**Figure S5**

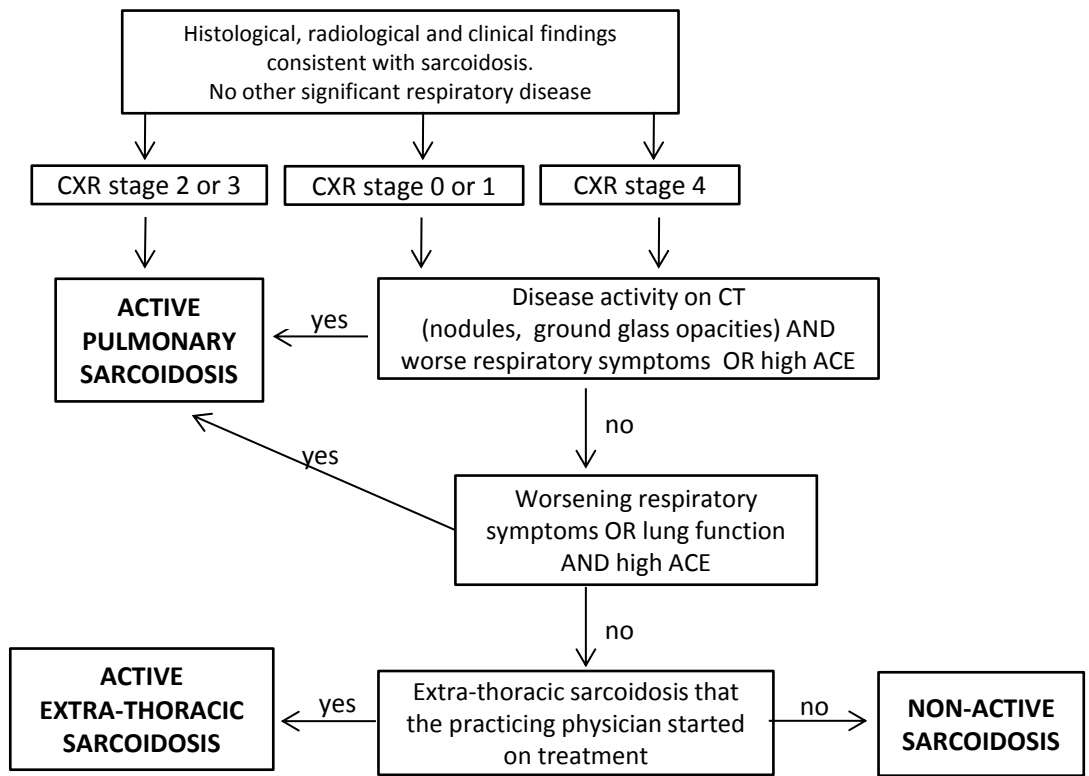

Supplement: S5 (10.1371/journal.pone.0070630.s005) [file journal.pone.0070630.s005]
