# Supplementary material for: Transcriptional Blood Signatures Distinguish Pulmonary Tuberculosis, Pulmonary Sarcoidosis, Pneumonias and Lung Cancers
Source: PLOS journal article supplement (doi:10.1371/journal.pone.0070630), 2013-08-05
Supplement: S9 (10.1371/journal.pone.0070630.s009) [file journal.pone.0070630.s009]

# Figure S9

Top 8 pathways contains

- EIF2 Signalling
- mTOR signalling

Top 2 pathways are

- Interferon Signalling
- Antigen Presentation Pathway

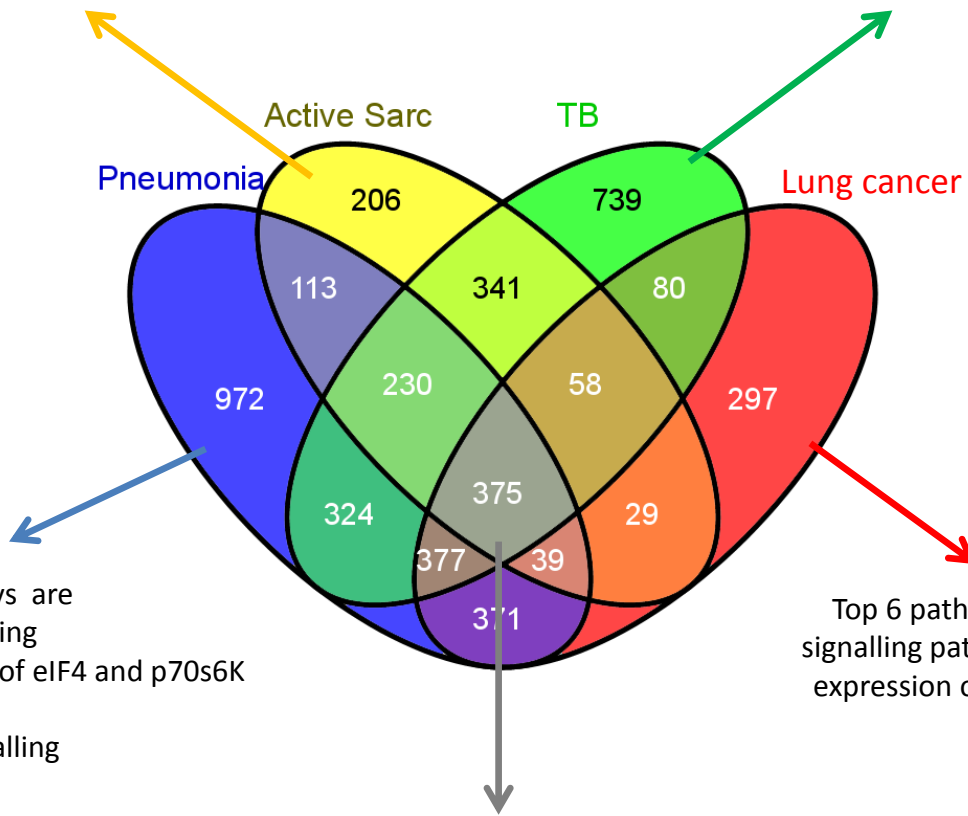

Top 3 pathways are

- EIF2 Signalling
- Regulation of eIF4 and p70s6K Signalling
- mTOR signalling

Top 6 pathways contains 4 signalling pathways and under-expression of T cell pathways

*Genes Common To All Diseases:*  
Top 10 pathways contained under-abundance of T-cell and B-cell pathways
